# Supplementary material for: Unravelling Atrioventricular Block Risk in Inflammatory Diseases: Systemic Inflammation Acutely Delays Atrioventricular Conduction via a Cytokine‐Mediated Inhibition of Connexin43 Expression
Source: PubMed Central journal article supplement — J Am Heart Assoc. 2021 Oct 29;10(21):e022095. doi: 10.1161/JAHA.121.022095 (PMC8751850; doi:10.1161/jaha.121.022095), 2021-10-29
Supplement: JAH3-10-e022095-s001.pdf [file JAH3-10-e022095-s001.pdf]

## **SUPPLEMENTAL MATERIAL**

**Table S1. Demographic and clinical characteristics, and ongoing therapies of patients with inflammatory diseases.**

|                                                       |                  |
|-------------------------------------------------------|------------------|
| Patients, n                                           | 46               |
| Age, years(range)                                     | 73.9±16.8 (18.5) |
| Females, n                                            | 25/46 (54%)      |
| Definite inflammatory diseases, n                     | 46/46 (100%)     |
| <i>Acute infections</i>                               | 31/46 (68%)      |
| Pneumonia                                             | 12/31 (41%)      |
| Sepsis                                                | 6/31 (19%)       |
| Biliary tract infection                               | 5/31 (16%)       |
| Urinary tract infection                               | 4/31 (12%)       |
| Acute bronchitis                                      | 3/31 (9%)        |
| Spondylodiscitis                                      | 1/31 (3%)        |
| Skin infection*                                       | 1/31 (3%)        |
| <i>Immune-mediated diseases</i>                       | 13/46 (28%)      |
| Rheumatoid arthritis                                  | 10/13 (77%)      |
| Inflammatory bowel disease*                           | 1/13 (8%)        |
| Polymyalgia rheumatica                                | 1/13 (8%)        |
| Cryoglobulinemic vasculitis                           | 1/13 (8%)        |
| <i>Other</i>                                          | 2/46 (4%)        |
| Acute microcrystalline arthritis                      | 1/2 (50%)        |
| Acute pancreatitis                                    | 1/2 (50%)        |
| Therapeutic interventions for inflammatory disease, n | 46/46 /100%)     |
| <i>Antibiotics</i>                                    | 32/46 (70%)      |
| Piperacillin/Tazobactam                               | 14/32 (42%)      |
| Ceftriaxone                                           | 5/32 (15%)       |
| Amoxicillin/Clavulanate                               | 4/32 (12%)       |
| Levofloxacin                                          | 4/32 (12%)       |
| Vancomycin                                            | 4/32 (12%)       |
| Metronidazole                                         | 2/32 (9%)        |
| Clarithromycin                                        | 2/32 (6%)        |
| Imipenem                                              | 2/32 (6%)        |
| Ceftazidime                                           | 1/32 (3%)        |
| Teicoplanin                                           | 1/32 (3%)        |
| Meropenem                                             | 1/32 (3%)        |
| Oxacillin                                             | 1/32 (3%)        |
| Colistin                                              | 1/32 (3%)        |
| Fluconazole                                           | 1/32 (3%)        |
| <i>Anti-inflammatory drugs</i>                        | 13/46 (28%)      |
| Corticosteroids                                       | 10/13 (77%)      |
| Tocilizumab                                           | 9/13 (69%)       |
| Methotrexate                                          | 2/40 (15%)       |
| Cyclosporine                                          | 1/13 (8%)        |
| Leflunomide                                           | 1/13 (8%)        |
| Abatacept                                             | 1/13 (8%)        |
| Colchicine                                            | 1/13 (8%)        |
| <i>Other</i>                                          | 1/46 (2%)        |
| Gabexate mesilate                                     | 1/1 (100%)       |

---

Age is expressed as mean ±standard deviation (interquartile range).

\*In one patient, both skin infection and inflammatory bowel disease were concomitantly detected. This patient has been counted in the “Immune-mediated disease” group.

**Table S2. Demographic, electrocardiographic and laboratory characteristics of subjects in the control group.**

|                                      |                 |
|--------------------------------------|-----------------|
| Subjects, n                          | 30              |
| Age, years                           | 73.4±5.2 (7.0)† |
| Females, n                           | 19 (63%)†       |
| Heart rate, bpm                      | 66.5 (14.2)     |
| PR interval, ms                      | 156.7 (19.2)    |
| Patients with PR interval>200 ms, n  | 1 (3%)          |
| PRc interval, ms                     | 156.9 (24.2)    |
| Patients with PRc interval>200 ms, n | 0 (0%)          |
| PR segment, ms                       | 53.3 (23.3)     |
| PRc segment, ms                      | 55.6 (21.1)     |
| CRP, mg/dl                           | 0.11 (0.17)     |
| IL-6, pg/ml                          | 0.09 (0.33)     |
| IL-1, pg/ml                          | 0.05 (0.32)     |
| TNFα, pg/ml                          | 0.42 (0.22)     |
| IL-10, pg/ml                         | 0.52 (0.19)     |
| Cx43                                 | 1.31±0.52       |

---

PRc interval: heart rate-corrected PR interval; PRc segment: heart rate-corrected PR segment; CRP: C-reactive protein (reference values <0.5 mg/dl); IL-6: interleukin-6 (reference values 0.49-1.25 pg/ml)\*; IL-1: interleukin-1 (reference values 0.08-0.29 pg/ml)\*; TNFα: tumor necrosis factor alpha (reference values 0.6-3.24 pg/ml)\*; IL-10: interleukin-10 (reference values 0-3.6 pg/ml)\*; Cx43: connexin 43 mRNA levels in peripheral blood mononuclear cells.

\*Cytokine level range measured in an internal reference group of healthy controls.

†p>0.05 vs patients with systemic inflammation (two tail Mann-Whitney test and Fisher exact test, respectively).

Values are expressed as median (interquartile range), or frequency count and percentages. Age is expressed as mean ±standard deviation (interquartile range).

**Table S3. Demographic, clinical, laboratory and echocardiography characteristics of patients studied for correlation of connexin43 expression between atrial and/or ventricular tissue and blood.**

| Patient | Heart chamber   | Age, years | Sex    | Diagnosis                                                                  | EF, % | proBNP, pg/ml | CRP, mg/dl |
|---------|-----------------|------------|--------|----------------------------------------------------------------------------|-------|---------------|------------|
| 1       | Left atrium     | 63         | Male   | Ischemic cardiomyopathy                                                    | <20   | 842           | 0.15       |
|         | Left ventricle  |            |        |                                                                            |       |               |            |
|         | Right ventricle |            |        |                                                                            |       |               |            |
| 2       | Right atrium    | 59         | Male   | Aortic valve prosthetic endocarditis                                       | 60    | 3149          | 5.68       |
| 3       | Left atrium     | 79         | Female | Aortic valulopathy                                                         | 60    | 131           | 0.08       |
| 4       | Right atrium    | 79         | Male   | Mitral and aortic valulopathy                                              | 55    | 58            | 0.57       |
| 5       | Right atrium    | 81         | Male   | Mitral and aortic valulopathy                                              | 55    | 821           | 1.15       |
| 6       | Right atrium    | 60         | Male   | Mitral and aortic valulopathy                                              | 60    | 132           | 0.03       |
| 7       | Left atrium     | 60         | Female | Mitral valulopathy                                                         | 70    | 77            | 0.46       |
| 8       | Right atrium    | 73         | Female | Aortic valulopathy                                                         | 50    | 346           | 0.01       |
| 9       | Left atrium     | 55         | Male   | Ischemic cardiomyopathy                                                    | <20   | 813           | 4.06       |
|         | Left ventricle  |            |        |                                                                            |       |               |            |
|         | Right ventricle |            |        |                                                                            |       |               |            |
| 10      | Right atrium    | 56         | Male   | Interatrial communication with partial anomalous pulmonary venous drainage | 55    | 1697          | 0.35       |
| 11      | Right atrium    | 75         | Female | Mitral and aortic valulopathy                                              | 55    | 155           | 0.53       |
| 12      | Left atrium     | 57         | Male   | Mitral valulopathy                                                         | 60    | 131           | 0.03       |
| 13      | Left ventricle  | 47         | Female | Hypertrophic cardiomyopathy                                                | 35    | 5066          | 0.34       |
|         | Right ventricle |            |        |                                                                            |       |               |            |
| 14      | Left ventricle  | 59         | Female | Hypertrophic cardiomyopathy                                                | 40    | 524           | 0.08       |

---

EF: ejection fraction; proBNP: pro-brain natriuretic peptide; CRP: C-reactive protein.

**Table S4. Demographic, clinical, electrocardiographic and laboratory findings in inflammatory disease patients with PRc>200 ms vs those with PRc<200 ms during active disease (PRE).**

|                         | <b>PRc&gt;200 ms</b> | <b>PRc&lt;200 ms</b> | <i>p</i>          |
|-------------------------|----------------------|----------------------|-------------------|
| Patients, n             | 11/46 (24%)          | 35/46 (76%)          | -                 |
| Age, years              | 84.8±9.0 (16.5)      | 70.1±17.3 (23.0)     | <b>0.0052</b>     |
| Females, n              | 6/11 (55%)           | 19/35 (54%)          | 1.0               |
| IL-6 (PRE), pg/ml       | 22.0 (38.5)          | 11.2 (12.3)          | <b>0.048</b>      |
| PRc-interval (POST), ms | 195.4 (42.6)         | 156.9 (23.9)         | <b>&lt;0.0001</b> |
| PRc-segment (POST), ms  | 80.2 (36.9)          | 57.7 (12.3)          | <b>&lt;0.0001</b> |
| CVD, n                  | 5/11 (45%)           | 18/35 (51%)          | 1.0               |
| Heart disease*, n       | 1/11 (9%)            | 9/35 (26%)           | 0.24              |
| Hypertension, n         | 4/11 (36%)           | 8/35 (23%)           | 0.44              |
| Diabetes, n             | 2/11 (18%)           | 5/35 (14%)           | 1.0               |

---

CVD: patients with heart disease and/or hypertension and/or diabetes; PRc-interval: heart rate-corrected PR interval; PRc-segment: heart rate-corrected PR segment; IL-6: interleukin-6 (reference values 0.49-1.25 pg/ml); PRE: active disease; POST: after therapeutic interventions resulting in a CRP decrease >75% when compared to the baseline. Cytokine level range measured in an internal reference group of healthy controls.

\*Including: chronic heart failure, coronary artery disease, hypertensive heart disease, valvular heart disease.

Values are expressed as median (interquartile range), or mean±standard deviation, or frequency count and percentages.

Differences were evaluated by the two-tail Mann-Whitney test or unpaired T-test.

Difference in categorical variables were evaluated by the two-sided Fisher's exact test.

P values <0.05 are presented in bold.

**Table S5. Changes in laboratory and electrocardiographic parameters in a sub-cohort of patients with inflammatory diseases (n=13) underwent expression analysis of circulating connexin43, during active disease (PRE) and after therapeutic interventions resulting in a CRP decrease >75% when compared to the baseline (POST).**

|                      | PRE             | POST            | <i>p</i>          |
|----------------------|-----------------|-----------------|-------------------|
| CRP,mg/dl            | 16.8 (12.8)     | 1.8 (1.5)       | <b>&lt;0.0001</b> |
| IL-6, pg/ml          | 22.3 (57.4)     | 3.7 (4.7)       | <b>0.004</b>      |
| IL-1, pg/ml          | 0.39 (0.47)     | 0.32 (0.41)     | 0.32              |
| TNF $\alpha$ , pg/ml | 0.80 (0.31)     | 0.80 (0.32)     | 0.73              |
| IL-10, pg/ml         | 0.60 (0.22)     | 0.49 (0.16)     | 0.96              |
| PRc-interval, ms     | 179.1 (68.1)    | 167.5 (29.6)    | <b>0.024</b>      |
| PRc-segment, ms      | 84.6 (65.1)     | 69.3 (36.7)     | <b>0.012</b>      |
| Cx43                 | 1.01 $\pm$ 0.44 | 1.24 $\pm$ 0.87 | 0.15              |

---

PRc-interval: heart rate-corrected PR interval; PRc-segment: heart rate-corrected PR segment; CRP: C-reactive protein (reference values <0.5 mg/dl); IL-6: interleukin-6 (reference values 0.49-1.25 pg/ml); TNF $\alpha$ : tumor necrosis factor alpha (reference values 0.6-3.24 pg/ml); IL-1: interleukin-1 (reference values 0.08-0.29 pg/ml). Cytokine level range measured in an internal reference group of healthy controls.

Values are expressed as mean $\pm$ standard deviation or median (range).

Differences were evaluated by the two-tail Student's paired "t" test, or the two-tail Wilcoxon matched pairs test.

Figure S1. Relationship over time between PRc-interval and PRc-segment with IL-6 levels in inflammatory disease patients presenting with PRc-interval>200 ms during active disease.

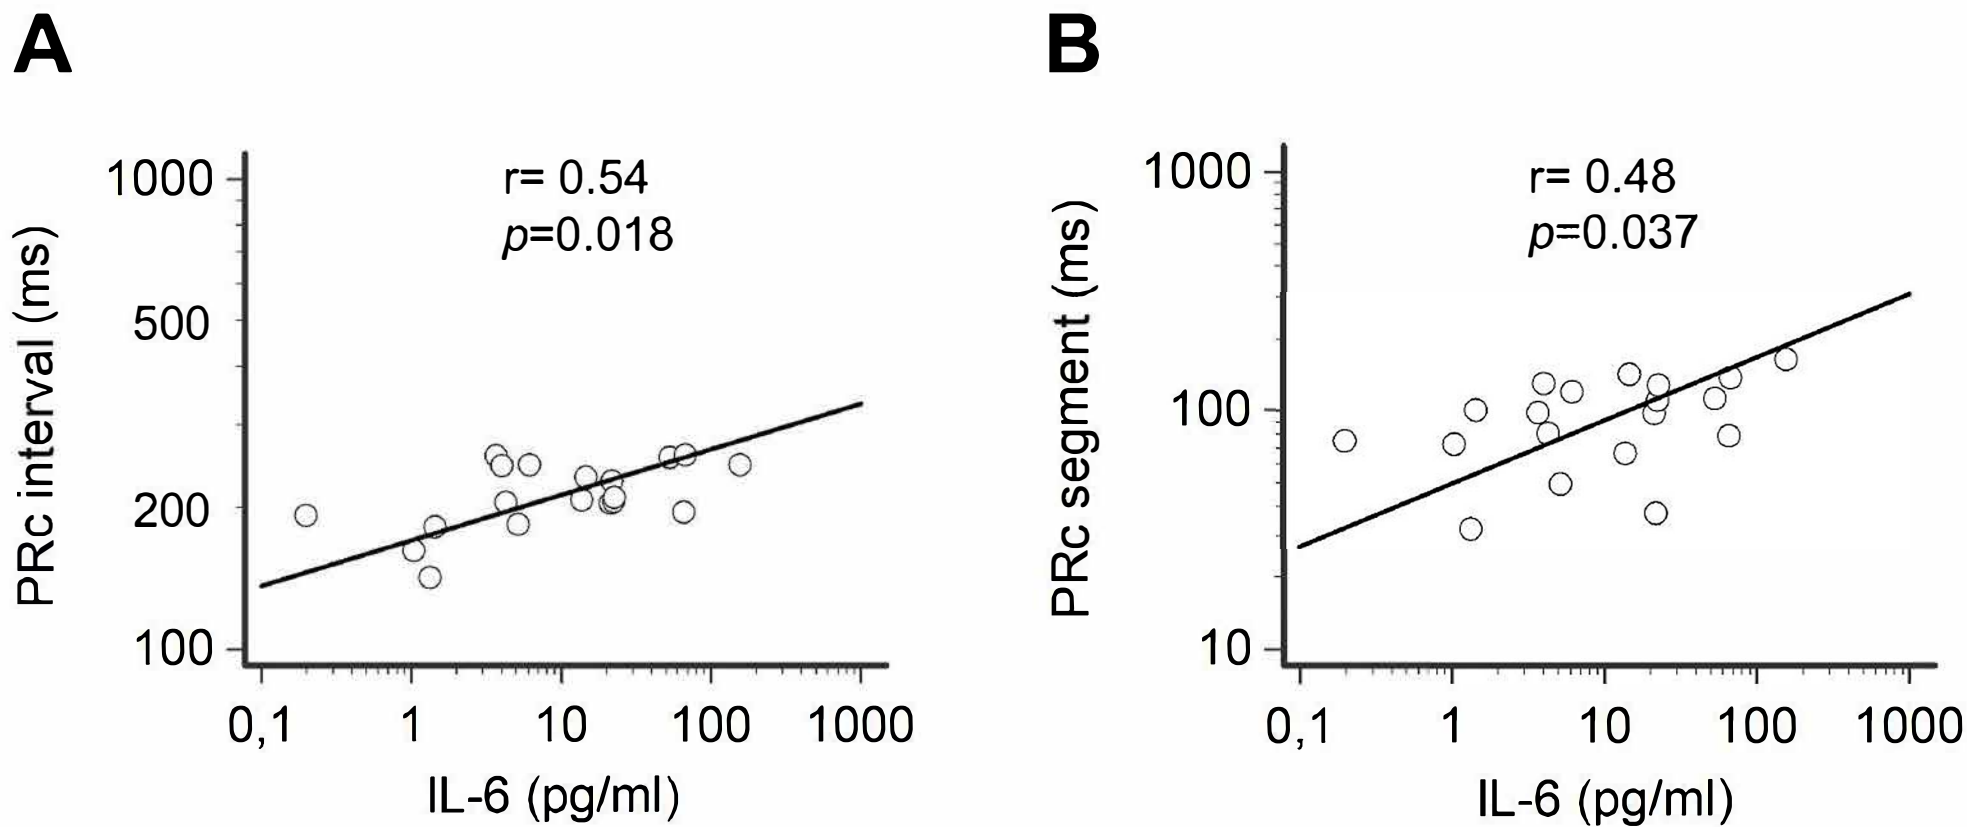

Spearman test. Patients, n=11. PRc-interval: heart rate-corrected PR interval; PRc-segment: heart rate-corrected PR segment; IL-6: interleukin-6.
